# Supplementary material for: Computed Tomography-Based Thrombus Imaging for the Prediction of Recanalization after Reperfusion Therapy in Stroke
Source: PubMed Central journal article supplement — J Stroke. 2017 Jan 31;19(1):40–9. doi: 10.5853/jos.2016.01522 (PMC5307933; doi:10.5853/jos.2016.01522), 2017-01-31
Supplement: jos-2016-01522-supple1.pdf [file jos-2016-01522-supple1.pdf]

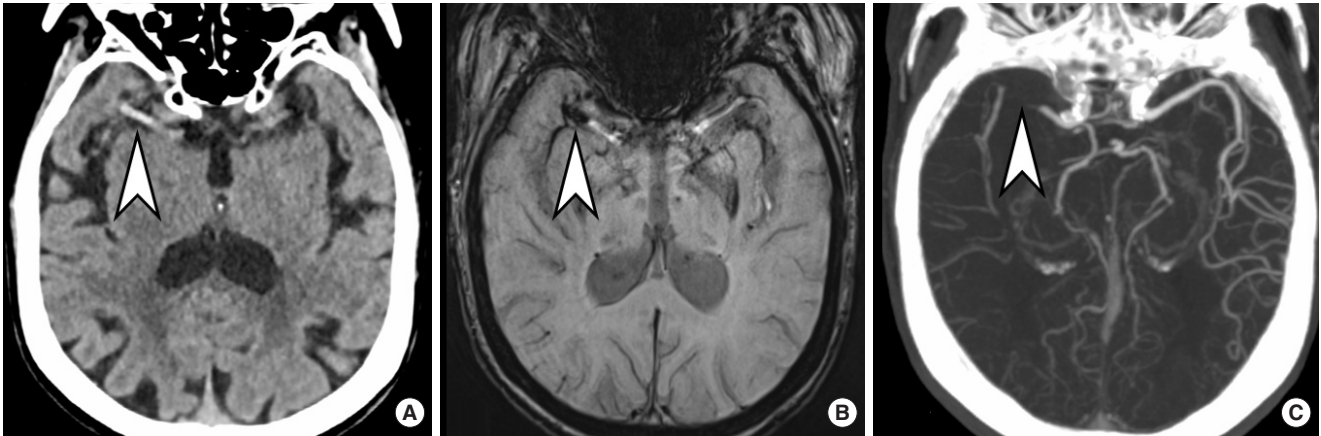

**Supplementary Figure 1.** Diagnosis of thrombus in imaging studies. (A) Hyperdense artery sign on CT scan (arrowhead), (B) Blooming artifact on the susceptibility-weighted image (arrowhead), and (C) Occlusion on CT angiography (arrowhead). CT-Computed Tomography.
