# Supplementary material for: Computed Tomography-Based Thrombus Imaging for the Prediction of Recanalization after Reperfusion Therapy in Stroke
Source: PubMed Central journal article supplement — J Stroke. 2017 Jan 31;19(1):40–9. doi: 10.5853/jos.2016.01522 (PMC5307933; doi:10.5853/jos.2016.01522), 2017-01-31
Supplement: jos-2016-01522-supple2.pdf [file jos-2016-01522-supple2.pdf]

**Supplementary Table 1.** Thrombus histology according to the stroke subtypes

| Author, year                  | Patient No. | Device                  | Staining                                                             | Analysis                                 | RBC-dominance | Fibrin/fibrin-platelet-dominance |
|-------------------------------|-------------|-------------------------|----------------------------------------------------------------------|------------------------------------------|---------------|----------------------------------|
| Marder, 2006 <sup>1</sup>     | 25          | Merci                   | H&E                                                                  | Feature detection analysis               | No difference | No difference                    |
| Liebeskind, 2011 <sup>2</sup> | 50          | Merci                   | H&E                                                                  | Semi-automated quantitation using ImageJ | No difference | No difference                    |
| Sato, 2012 <sup>3</sup>       | 17          | Autopsy                 | FibII, GPIIb/IIIa, glycophorin A                                     | Semi-automated quantitation using ImageJ | Cardiac       | No difference                    |
| Niessen, 2014 <sup>4</sup>    | 22          | Merci, Trevo, Solitaire | H&E, Mallory's phosphotungstic acid-hematoxylin, glycophorin A, CD31 | Quantitation by consensus                | Arterial      | No differences                   |
| Kim, 2015 <sup>5</sup>        | 37          | Solitaire, Aspiration   | platelet glycoprotein IIIa, CD61                                     | Semi-automated quantitation using ImageJ | Cardiac       | Arterial (fibrin)                |
| Ahn, 2016 <sup>6</sup>        | 32          | Aspiration              | H&E, Martius scarlet blue, CD42b                                     | Quantitation by software                 | Arterial      | Cardiac (fibrin)*                |

H&E, hematoxylin and eosin; RBC, Red blood cell.

## References

- Marder VJ, Chute DJ, Starkman S, Abolian AM, Kidwell C, Liebeskind D, et al. Analysis of thrombi retrieved from cerebral arteries of patients with acute ischemic stroke. *Stroke* 2006; 37:2086–2093.
- Liebeskind DS, Sanossian N, Yong WH, Starkman S, Tsang MP, Moya AL, et al. CT and MRI early vessel signs reflect clot composition in acute stroke. *Stroke* 2011;42:1237–1243.
- Sato Y, Ishibashi-Ueda H, Iwakiri T, Ikeda Y, Matsuyama T, Hatakeyama K, et al. Thrombus components in cardioembolic and atherothrombotic strokes. *Thromb Res* 2012;130:278–280.
- Niessen JM, van der Schaaf IC, van Dam L, Vink A, Vos JA, Schonewille WJ, et al. Histopathologic composition of cerebral thrombi of acute stroke patients is correlated with stroke subtype and thrombus attenuation. *PLoS One* 2014;9:e88882.
- Kim SK, Yoon W, Kim TS, Kim HS, Heo TW, Park MS. Histologic analysis of retrieved clots in acute ischemic stroke: correlation with stroke etiology and gradient-echo MRI. *AJNR Am J Neuroradiol* 2015;36:1756–1762.
- Ahn SH, Hong R, Choo IS, Heo JH, Nam HS, Kang HG, et al. Histologic features of acute thrombi retrieved from stroke patients during mechanical reperfusion therapy. *Int J Stroke* 2016; 11:1036–1044.
